# Supplementary material for: Perceived Risks and Benefits of Disclosing ADHD to AI-based Educational Technologies: Semi-structured Interviews
Source: Research Square preprint supplement (doi:10.21203/rs.3.rs-6106311/v1), 2025-03-04
Supplement: Supplementary file 1 [file a187ec32ffdf40d1f0990f8e.docx]

# Supplementary Material: Research Protocol Disability Disclosure and AI Educational Technologies

## Research Questions

How do students with disabilities assess the risk-benefits of disclosing their disability in the use of AI-based educational technologies?

1. How do students with ADHD perceive the utility of AI EdTech?
2. What are the students’ perceived risks of disclosing disability status to AI-based education technologies?
3. What are the students’ perceived benefits of disclosing disability status to AI-based education technologies?
4. Under which conditions are students willing to disclose their ADHD?

## Hypothesis

1. Hypothesis: Students with invisible disabilities feel more comfortable sharing their disability with an AI rather than a human.
2. Hypothesis: If a student experienced negative attitudes towards their disabilities in the educational context, students with invisible disabilities would not share their disability status if they could be identified by lecturers for fear of discrimination.
3. Hypothesis: If a student feels confident with their disabilities (“Disability as identity”), they are more likely to disclose their disability status to an AI or a human.

## Coding procedure (From August 19th 2024 to October 11th)

1. The first author created an initial coding table following the literature and the interview guidelines.
2. The first author explained the coding table to the second coder.
3. Both coders coded two interviews (Transcript 1 and 2) independently.
4. The two coders reviewed the interviews, discussed disagreements, and clarified the coding table.
5. Both coders coded the rest of the interviews independently.
6. Three interviews (transcript 10, 16, and 9) were reviewed completely. As before, disagreements were discussed until a solution could be found. After this stage, it was clear that differences were not substantial and coding was similar.
7. The first coder compared the background codes (“General AI use and perception” and “Background with ADHD”) with hers and the ones from the second coder. After comparison and checking that no information was missing, the first coder reorganised these background codes and created more meaningful categories where necessary.
8. The first coder reorganized the core codes (“Case: At-risk predictions” and “Case: AI Tutors”) and created more meaningful categories.
9. The new categories were given and explained to the second coder who then reorganised her codes based on the new categories.
10. The codes were again compared and disagreement were cleared (either during online meeting or asynchronously via memo).

## Initial coding table

| Overarching category | Subcodes | Description | Question number and Literature connected to the code |
| --- | --- | --- | --- |
| General AI use and perception | **AI use**   - Types of AI   - Chatbots (e.g. ChatGPT)   - Editors (e.g. Grammarly, Duden, Word)   - Translation tools (e.g. DeepL) - Overall experience AI   - Positive   - Negative / limitations - Reasons not to use AI in studies | This code gathers all information related to the general use of AI in studies. | Q1 |
| **General attitude data privacy**   - Measures taken to protect data - Attitude type   - “My data is already collected everywhere anyway”   - I should care more, but I do not.   - Very protective | This code gathers all information related to how students think about data privacy and the measures they take to protect them. | Q2  [6, 10] |
| **Awareness university use of data**   - I do not know - Examples of measures   - … - Trust in university | This code gathers all answers about how their university handle their data. It also gathers information on the level of trust students have towards their university. | Q2  [6, 10] |
| Background on ADHD | **Ease to talk about ADHD**   - Duty to destigmatize. - Positive environment   - Friends with ADHD   - Inclusive and interested people - Part of identity | This code gathers all information on the facility participants have to talk about their ADHD in general. It collects information on reasons why it might be easy or not to talk about their ADHD. | Q3  [3] |
| **Past experience with university**   - With staff   - Positive   - Negative - With other students   - Positive   - Negative | This code gathers all information related to the past experience students had when talking about their ADHD at university. | Q5  [2] |
| **Impact ADHD on studies**   - Deadlines / Time management - Reading | This code gathers all information on how ADHD impact the participants’ studies. | Q4  [7, 9] |
| **Source of information**   - Mental health professionals (e.g. therapists) - Official websites - Social media | This code gathers all information on where students find information on ADHD. | Q6  [8] |
| Case: At-risk predictions | **Perceived benefits** | This code gathers all information on the general perceived benefits or positive aspects of the use of AI-based at-risk predictions in higher education. | Q7 and Q8 |
| **Perceived risks** | This code gathers all information on the general perceived risks or negative aspects of the use of AI-based at-risk predictions in higher education. | Q7 and Q8  [1] |
| **Improvement ideas** | This code gathers the ideas that participants gave to make the interventions of at-risk predictions more helpful. | Q8 |
| **Sharing ADHD**   - Yes   - Help others   - Improve accuracy - No | This code gathers the information on whether and why participants would indicate in the system that they have ADHD. | Q9 |
| **Access**   - Allowed   - Lecturers / tutors (people grading)   - Faculty staff (not grading)   - Programming team   - Only me - Not allowed   - Lecturers / tutors (people grading)   - Faculty staff (not grading) | This code gathers all answers on who should have access or not and explanations for it. | Q10  [5, 6, 10] |
| **Storing**   - Anonymised / Pseudonymised - With name - In Switzerland | This code gathers all answers on how data should be stored. | Q11  [6, 10] |
| **Wish**   - Yes - No - Uncertain | This code gathers all answers on whether participants would wish that their universities would use AI for at-risk predictions on or not. The code also gathers reasons why participants would wish for it or not and whether this would apply to them personally or not. | Q12 |
| Case: AI tutors | **Perceived benefits** | This code gathers all information on the general perceived benefits or positive aspects of the use of AI Tutors in higher education. | Q13, Q14, and Q15 |
| **Perceived risks** | This code gathers all information on the general perceived risks or negative aspects of the use of AI tutors in higher education. | Q13, Q14, and Q15  [1, 4] |
| **Sharing ADHD**   - Yes   - Help others   - More personalised - No | This code gathers the information on whether and why participants would indicate in the system that they have ADHD. | Q16 |
| **Access**   - Allowed   - Lecturers / tutors (people grading)   - Faculty staff (not grading)   - Programming team   - Only me - Not allowed   - Lecturers / tutors (people grading)   - Faculty staff (not grading) | This code gathers all answers on who should have data access or not and explanations for it. | Q17  [5, 6] |
| **Storing**   - Anonymised / Pseudonymised - With name - In Switzerland | This code gathers all answers on how data should be stored. | Q18 and Q19  [6] |
| **Tool from university** | This code gathers all answers on what participants think about the fact that universities could be offering a text editor tool instead of it being from a private company | Q19  [6] |
| **Wish**   - Yes - No - Uncertain | This code gathers all answers on whether participants would wish that their universities would use AI tutors or not. The code also gathers reasons why participants would wish for it or not and whether this would apply to them personally or not. |  |
| Comparison | - At-risk > tutor - Tutor > At-risk - Both good - Both bad | This code gathers the different appreciations of the two use cases. | Q21 |
| Functions | - Course summary - Mental health support - … | This code gathers all AI tools, functions or features that participants wished for for their studies. | Q21 |

## Final Coding Table

| Overarching category | Subcodes | Description | Question number and Literature connected to the code |
| --- | --- | --- | --- |
| General AI use and perception | **AI use**   - Types of AI   - Chatbots (e.g. ChatGPT)   - Editors (e.g. Grammarly, Duden, Word)   - Translation tools (e.g. DeepL)   - Mixing tools   - Constructing own AI   - Summarizing tools   - Image-generation   - Flash card app   - Math app   - Research tool   - Text-to-speech software - Overall experience AI   - Perceived usefulness / Reasons to use   - Negative / limitations / reasons not to use   - Skeptical at the beginning | This code gathers all information related to the general use of AI in studies. | Q1 |
| **General attitude data privacy**   - Measures taken to protect data - Attitude type   - Carefree   - Careful   - Very protective - Sharing ADHD in AI | This code gathers all information related to how students think about data privacy and the measures they take to protect them. | Q2  [6, 10] |
| **Awareness university use of data**   - I do not know - Examples of measures - Trust in university - Do not read everything | This code gathers all answers about how their university handle their data. It also gathers information on the level of trust students have towards their university. | Q2  [6, 10] |
| Background on ADHD | **Ease to talk about ADHD**   - Person- / Context-dependent   - Lack of understanding / avoid conversation   - Positive environment - Open to talk about it (easy or rather easy - Not shared   - Reasons not to disclose ADHD     - Avoiding negative attitudes     - No benefit     - Recently diagnose     - Prefers to adapt     - Not everyone should know | This code gathers all information on the facility participants have to talk about their ADHD in general. It collects information on reasons why it might be easy or not to talk about their ADHD. | Q3  [3] |
| **Past experience with university**   - With staff   - Positive   - Negative - With other students   - Positive   - Negative - Overall good past experience - Not talked about - Not a lot of experience | This code gathers all information related to the past experience students had when talking about their ADHD at university. | Q5  [2] |
| **Impact ADHD on studies**   - Difficulties - Solutions - Positive aspects - Fear of losing support - None due to medication | This code gathers all information on how ADHD impact the participants’ studies. | Q4  [7, 9] |
| **Source of information**   - Internet   - Social media   - Official websites   - AI   - Youtube   - App   - Blog   - Podcast   - Videos - Mental health professionals (e.g. therapists) - Academic literature - Social environment   - Friends   - Professor   - Studies in psychology   - People with ADHD   - Family   - Mund-zu-mund - Non-academic book - Everywhere | This code gathers all information on where students find information on ADHD. | Q6  [8] |
| Case: At-risk predictions | **General**   - Perceived benefits   - Proactive support     - Provide accommodations     - Early support   - Motivation reflection     - Manage expectations - Perceived risks   - Inaccurate predictions     - Wrong predictors     - Due to ADHD symptoms     - No human control   - Labelling / Stigmatisation/stereotyping   - Negative emotions     - Stressful     - Distress in untransparent situations   - Misuse     - Gaming the system     - Selecting students   - In eine Opferrolle fallen   - Data analysis / sharing per se problematic - Not useful / Inefficient   - Low personalisation / ADHD too individual   - Self-help     - Students should help themselves as a principle     - Learning resources     - Support system already exists - Conditions   - Remain in control   - Freiwillige Teilnahme   - Data management transparency - Improvement ideas   - Detailed info     - With explanations     - Compare with others     - With positive formulation     - Show both positive and negative aspects   - Intervention     - Send reminders     - Focus on how     - Provide resources   - Better data     - Very individualised     - Content data   - Peer group   - Human control   - No improvement possible - Uncertain | This gathers all general opinions on at-risk predictions that cannot be identified for specific interventions. |  |
| **Intervention 1: Automatic list**   - Perceived benefits   - Proactive support     - First contact     - Individualised     - Early     - For shy persons     - Reminder   - Motivation/reflection     - Push to start     - Encourage to contact     - Student am Ball halten     - Reflecting on progress - Perceived risks   - Labelling / Stigmatisation/stereotyping   - Negative emotions     - Stressful     - Demotivating     - Where does this come from?     - Erstmal nachdenklich     - Patronizing     - Wütend - Not useful / Inefficient   - Person knows they are struggling   - From AI not motivating / email can be ignored | This code gathers all information on the general perception of the first intervention with automatic list (without human involvement). | [1] |
| **Intervention 2: List to lecturer**   - Perceived benefits   - Proactive support     - Provide support person other than lecturer     - Early     - Get exercises     - I can explain myself     - Taktgefühl - Perceived risks   - Labelling / Stigmatisation/stereotyping   - Negative emotions     - Exposed     - Stressful     - Demotivating   - Losing university flexibility - Not useful / Inefficient   - Self-help: You can contact lecturers/tutors   - Not possible / no time / no motivation   - In a small group | This code gathers all information on the general perception of the second intervention where the list of predictions is given to lecturers. |  |
| **Intervention 3: Structural measure**   - Perceived benefits   - Rethinking structure / future measures     - Course quality     - Support disadvantaged people - Not useful / inefficient   - Takes time   - Wont improve didactic   - Not sure change is good for everybody | This code gathers all information on the general perception of the third intervention where information are used to implement structural measures to improve university. |  |
| **Sharing ADHD**   - Yes   - Condition     - If anonymous     - If informed     - If really well optimised     - If only lecturers see info     - If proactively asked for   - Benefit     - Get accurate predictions     - Better intervention     - Help others     - Get support   - No disadvantage for me - No   - Bias risk   - Einschränkungen bekommen   - Better talk to specialist - Undecided / Sekptical   - Probably wont work   - If useful   - Unter Umstände   - Only if proven it helps - Generally needed - First test without | This code gathers the information on whether and why participants would indicate in the system that they have ADHD. This code also gathers information on the conditions under which they would disclose their ADHD, reasons for sharing or not | Q9 |
| **Access**   - Allowed   - Faculty staff (not grading)     - Reasons       - Controlling for errors       - Trust       - Provide support     - Conditions       - If independent       - If anonymised       - If restricted purpose   - Lecturers / tutors (people grading)     - Reasons       - Efficient intervention       - Taktgefühl       - Controlling for errors       - Trust     - Conditions       - Maintain data control       - First anonymised, then get contact       - Wenn geschult       - If no impact on grade       - If it concerns them       - If group statistics   - Programming team     - If non-disclosure agreement   - AI   - Me - Not allowed   - Lecturers / tutors (people grading)     - Risk for grading     - Too personal     - Lecturers not motivated     - Risk of discrimination     - Lack of trust   - Faculty staff (not grading)     - Risk for future work   - Third party     - Future employers | This code gathers all answers on who should have access or not and explanations and conditions for it. | Q10  [5, 6, 10] |
| **Storing**   - Anonymised / Pseudonymised   - Group statistics   - Verschlüsselt - With name   - Verschlüsselt   - Confidential - In Switzerland - University server - First anonymised then get contact - Time restricted - Enter once / single entry | This code gathers all answers on how data should be stored. | Q11  [6, 10] |
| **Wish**   - Yes   - Reasons     - Could foster inclusion   - Conditions     - Only if proven it helps     - With detailed analysis     - If time restricted     - If no negative consequence     - Only for systemic change     - Complementary     - If nuanced - No   - Reason: other possibilities exist - Undecided - Not for me, but others - If better developed | This code gathers all answers on whether participants would wish that their universities would use AI for at-risk predictions on or not. The code also gathers reasons why participants would wish for it or not and whether this would apply to them personally or not. | Q12 |
| Case: AI tutors | **General AI tutor**   - Perceived benefits   - University improvement     - Improving course     - Better structured   - Individually customised help   - United tool   - Already in use   - Support first generation   - No need to do anything   - Optimised for university   - For free - Perceived risks   - Reliability   - Not learning enough   - Losing time   - Again shared info   - Not own work - Conditions   - Data security   - One tool for many universities   - Good datasets   - Freiwillig   - Need many data to personalise   - Complementary | This code gathers all opinions (perceived benefits, risks, usefulness, and conditions) on the AI tutor generally. Those information could not be classified into one specific function of the tutor. | Q13, Q14, and Q15 |
| **Function 1: Learning and exam preparation**   - Perceived benefits   - Enhance understanding     - Already using or tried   - Independent from others   - Motivation - Perceived risks   - Not learning enough   - Losing human contact - Not useful   - Better to search on their own   - Cannot help on project   - Prefer humans - Conditions   - If optimised for uni   - If it works | This code gathers all opinions (perceived benefits, risks, usefulness, and conditions) on the first function of the AI tutor. | Q13, Q14, and Q15  [1, 4] |
| **Function 2: Explanation of exercices and instructions**   - Perceived benefits   - Help with personal difficulties   - Independent from others   - Improve learning - Perceived risks   - Not learning enough (tool reliance) - Not useful   - Prefer asking lecturer   - Instructions always clear - Conditions   - If zugänglich   - If it works | This code gathers all opinions (perceived benefits, risks, usefulness, and conditions) on the second function of the AI tutor. |  |
| **Function 3: Text Editor**   - Perceived benefits   - Support with ADHD symptoms / personal difficulties   - Adapt to uni standard   - Independent from others   - Additional editing   - Already use - Perceived risks   - Text standardization   - Looks plagiarised   - Not learning enough - Not useful   - Already have good solutions   - Not my writing style   - No need for now   - I am good at it - Conditions   - If providing feedback | This code gathers all opinions (perceived benefits, risks, usefulness, and conditions) on the third function of the AI tutor. |  |
| **Function 4: Study plans and recourse recommendations**   - Perceived benefits   - Personalised     - Adapted to learning style     - Difficulty starting     - Personalised recommendations     - Finding right media   - Improve learning   - Optimised at uni   - Counting ECTS - Not useful   - I know how to do that   - Lecturers’ task | This code gathers all opinions (perceived benefits, risks, usefulness, and conditions) on the fourth function of the AI tutor. |  |
| **Function 5: Time management and organisation support**   - Perceived benefits   - Help with personal difficulties / ADHD symptoms   - Optimised   - Could improve university organisation   - Deadline reminders   - Already use / tried - Not useful   - Too strict   - I overcompensate   - Already tools / systems for that   - Not doable   - Own responsability | This code gathers all opinions (perceived benefits, risks, usefulness, and conditions) on the fifth function of the AI tutor. |  |
| **Function 6: Networking support**   - Perceived benefits   - Find study partner   - Introvert   - Optimised uni - Not useful   - Easy to network with other students   - I do not learn well with others   - Too personal   - No need for AI for this   - Small study programme - Conditions / Potential   - Maybe to find other ADHD students   - If bigger groups   - Maybe for emotional support | This code gathers all opinions (perceived benefits, risks, usefulness, and conditions) on the sixth function of the AI tutor. |  |
| **Sharing ADHD**   - Yes   - Reasons     - For personalisation       - Time management       - Instructions       - Help with concentration       - Specialised font       - Short summaries to help learning       - Recommendations       - Tips to get started     - Would not work otherwise     - Connect with other ADHDer   - Uncertain     - Maybe more personalisation   - With conditions     - If no labelling effect / Sonderbehandlung     - If asked for     - If transparent     - If voluntary - No   - No benefits   - If not relevant   - Not human - Risks   - Labelling   - Not enough data   - Sharing info | This code gathers the information on whether and why participants would indicate in the system that they have ADHD and under which conditions. | Q16 |
| **Access**   - Allowed   - Faculty staff (not grading)     - Reasons       - Better understanding       - Quality control       - Improve course     - Conditions       - If anonymised       - If no consequence on herself       - If aware on topic       - If no impact on grading   - Programming team     - Reasons       - Tool weiterentwickeln / ADHS berücksichtigen     - Conditions       - If explicit consent       - If no personal info       - If no impact on grading       - Only if anonymised and confidentiality agreement   - Lecturers / tutors (people grading)     - Reasons       - Improve course       - Mehr Verständnis für Studierende     - Conditions       - If anonymised       - If no personal consequence       - If sensitive to ADHD       - If I decide   - Me - Not allowed   - Lecturers / tutors (people grading)     - Would change use     - Risk labelling     - Too personal     - Won't have time   - Nobody should have access   - Programming team     - Would share less personal data   - Third party   - Faculty staff (not grading) - Egal - Doubt staff wil have time to analyse | This code gathers all answers on who should have data access or not and explanations and conditions for it. | Q17  [5, 6] |
| **Storing**   - Anonymised / Pseudonymised   - Verschlüsselt - With name   - Schullogin - Chat history   - Chat history saved   - Chat history not saved - In Switzerland - Do not care - Individually - Cannot answer - At the university | This code gathers all answers on how data should be stored. | Q18 and Q19  [6] |
| **Tool from university**   - Better   - Data protection     - Trust more university     - If no combination use cases     - Important to protect research results     - No misuse from country   - More optimised   - Ensure work integrity   - Would be allowed - Negative   - Can universities provide tools as good as companies?   - Could use it against students   - Money   - No access after uni - Undecided | This code gathers all answers on what participants think about the fact that universities could be offering a text editor tool instead of it being from a private company. | Q19  [6] |
| **Wish**   - Yes   - Reasons     - Erleichterung / Unterstützung     - Time saving for lecturers     - Individualised     - Free     - Optimised for my uses   - Nice to have but not must have   - Some specific functions   - Complementary - No - Uncertain | This code gathers all answers on whether participants would wish that their universities would use AI tutors or not. The code also gathers reasons why participants would wish for it or not and whether this would apply to them personally or not. |  |
| Comparison | - At-risk > tutor - Tutor > At-risk - Both good - Both bad | This code gathers the different appreciations of the two use cases. | Q21 |

## References

[1] Marc Alier, Maria J. Casañ Guerrero, Daniel Amo, Charles Severance, and David Fonseca. 2021. Privacy and E-Learning: A Pending Task. *Sustainability* 13, 16 (2021). https://doi.org/10.3390/su13169206

[2] Hanna Bertilsdotter Rosqvist, Lill Hultman, Sofia Österborg Wiklund, Anna Nygren, Palle Storm, and Greta Sandberg. 2023. ADHD in higher education and academia. *Canadian Journal on Disability Studies* 12, 3 (2023), 1–26.

[3] Matthew Bisset, Leanne Winter, Christel M. Middeldorp, David Coghill, Nardia Zendarski, Mark A. Bellgrove, and Emma Sciberras. 2022. Recent Attitudes toward ADHD in the Broader Community: A Systematic Review. *J Atten Disord* 26, 4 (February 2022), 537–548. https://doi.org/10.1177/10870547211003671

[4] Ali Darvishi, Hassan Khosravi, Shazia Sadiq, Dragan Gašević, and George Siemens. 2024. Impact of AI assistance on student agency. *Computers & Education* 210, (March 2024), 104967. https://doi.org/10.1016/j.compedu.2023.104967

[5] Foad Hamidi, Kellie Poneres, Aaron Massey, and Amy Hurst. 2018. Who Should Have Access to my Pointing Data? Privacy Tradeoffs of Adaptive Assistive Technologies. In *Proceedings of the 20th International ACM SIGACCESS Conference on Computers and Accessibility* (*ASSETS ’18*), 2018. Association for Computing Machinery, New York, NY, USA, 203–216. https://doi.org/10.1145/3234695.3239331

[6] Kyle M. L. Jones, Andrew Asher, Abigail Goben, Michael R. Perry, Dorothea Salo, Kristin A. Briney, and M. Brooke Robertshaw. 2020. “We’re being tracked at all times”: Student perspectives of their privacy in relation to learning analytics in higher education. *Asso for Info Science & Tech* 71, 9 (September 2020), 1044–1059. https://doi.org/10.1002/asi.24358

[7] Sally Lindsay, Elaine Cagliostro, and Gabriella Carafa. 2018. A Systematic Review of Barriers and Facilitators of Disability Disclosure and Accommodations for Youth in Post-Secondary Education. *International Journal of Disability, Development and Education* 65, 5 (September 2018), 526–556. https://doi.org/10.1080/1034912X.2018.1430352

[8] Ashlee Milton, Juan F. Maestre, Abhishek Roy, Rebecca Umbach, and Stevie Chancellor. 2024. Seeking in Cycles: How Users Leverage Personal Information Ecosystems to Find Mental Health Information. In *Proceedings of the CHI Conference on Human Factors in Computing Systems* (*CHI ’24*), 2024. Association for Computing Machinery, New York, NY, USA. https://doi.org/10.1145/3613904.3641894

[9] Anabel Moriña. 2024. When what is unseen does not exist: disclosure, barriers and supports for students with invisible disabilities in higher education. *Disability & Society* 39, 4 (April 2024), 914–932. https://doi.org/10.1080/09687599.2022.2113038

[10] Yi-Shan Tsai, Alexander Whitelock-Wainwright, and Dragan Gašević. 2020. The privacy paradox and its implications for learning analytics. In *Proceedings of the Tenth International Conference on Learning Analytics & Knowledge*, March 23, 2020. ACM, Frankfurt Germany, 230–239. https://doi.org/10.1145/3375462.3375536
