# Supplementary material for: Perceived Risks and Benefits of Disclosing ADHD to AI-based Educational Technologies: Semi-structured Interviews
Source: Research Square preprint supplement (doi:10.21203/rs.3.rs-6106311/v1), 2025-03-04
Supplement: Supplementary file 2 [file a81d02630bb4b43198462a9e.docx]

# Supplementary Material: Interview guide

English translation below.

## Projektbeschreibung, Gesprächablauf und Einverständniserklärung

Vielen Dank nochmal, dass Sie an meiner Studie teilnehmen.

Sie sollten bereits die Einverständniserklärung gelesen und unterschrieben haben. In der Erklärung haben wir Sie informiert, dass das Gespräch aufgezeichnet und automatisch mit MS Teams transkribiert wird. Die Videodaten werden erst nach der Transkription und Analyse gelöscht. Wir benötigen die Videodaten, um die Transkripte zu korrigieren. Ihre Daten werden erst anonym, wenn wir die Transkripte korrigiert haben und die Videos gelöscht haben. Meine wissenschaftliche Assistentin, Albiona Hajdari (ZHAW), und ich werden die Transkripte korrigieren und kodieren. Sollten Sie Albiona kennen und nicht möchten, dass sie von Ihrer Teilnahme erfährt, teilen Sie mir dies bitte mit. In diesem Fall werde ich Ihr Transkript persönlich korrigieren. Weitere Personen, die im Projekt involviert sein können, sind meine zwei Betreuer, Prof. Dr. Alireza Darvishy (ZHAW) und PD Dr. Markus Christen (UZH). Ihre E-Mail-Adresse ist derzeit mit Ihrer Teilnehmendenummer verknüpft, damit wir die Interviews koordinieren und die Umfragedaten mit den Interviews verknüpfen können. Diese Verknüpfung zwischen Email und Nummer wird am Ende der Datensammlung gelöscht.

Ihre Daten werden auf dem OneDrive der UZH gespeichert. Der Cloud erfüllt der Sicherheitsstandard der Universität Zürich. Die anonymisierten Daten können im Rahmen der Veröffentlichung auch auf einem Repository für Forschungsdaten gespeichert werden.

Das Interview besteht aus drei Teilen. Zuerst werden wir über Ihre Nutzung von KI im Hochschulbereich sowie ob und wie Sie Ihre ADHS offenlegen möchten reden. Anschliessend werden wir zwei spezifische KI-Anwendungen diskutieren. Ich werde Ihnen jeweils die KI-Anwendung erklären und Sie können mir Rückfrage stellen, bevor ich die Frage bezüglich der Anwendung stelle. Zum Schluss werde ich Sie bitten über unsere Diskussion zu reflektieren.

Wenn Sie antworten können Sie gerne mir Beispiele nennen. Wenn Sie eine Frage nicht beantworten möchten, können Sie es mir sagen, ohne einen Grund zu geben.

Haben Sie Fragen, bevor ich die Aufzeichnung starte?

[Start der Aufzeichnung]

## Einleitungsfragen: KI-Nutzung und ADHS-Offenlegung im Hochschulbereich

1. Wie benutzen Sie KI in Ihrem Studium?
   1. Welche KI benutzen Sie?
   2. Wie war Ihre Erfahrung mit KI bisher?
2. Wie gehen Sie mit Ihren persönlichen Daten um?
   1. Wie behandelt die Hochschule Ihre Daten?
3. Wie leicht ist es für Sie über Ihre ADHS zu sprechen?
4. Wie beeinflusst ADHS Ihr Studienalltag?
5. Wie ist Ihre Erfahrung, wenn Sie über Ihre ADHS oder Bedürfnisse mit anderen Menschen an der Hochschule sprechen?
6. Wo suchen Sie nach Informationen über ADHS?

## Anwendungsfälle

Nun möchte ich mit Ihnen zwei Anwendungen von KI besprechen. Die Anwendungsfälle sind Beispiele für KI in Hochschulbereich, die derzeit in Entwicklung sind und bereits an einigen Universitäten weltweit eingesetzt werden. In diesen Beispielen gehen wir davon aus, dass die Daten sicher sind, und ohne Ihre Erlaubnis nicht an weitere Dritte weitergegeben werden.

Nachdem ich Ihnen den Fall erklärt habe, können Sie mir weitere Fragen über den Fall stellen, um ihn besser zu verstehen. Danach werde ich Ihnen einige Fragen zu Ihrer Meinung zu dem Fall stellen.

### Anwendungsfall 1: Früherkennung Systemen

Es besteht die Möglichkeit Daten von Studierenden zu benutzen, um frühzeitig zu identifizieren, welche Studierende Unterstützung für eine Prüfung oder das Studium brauchen könnte. Oft werden Daten wie Noten in relevanten Fächern der Matura oder vorheriger Semester sowie Interaktionsdaten mit Lernplattformen wie Moodle verwendet. Interaktionsdaten umfassen beispielweise die verbrachte Zeit auf der Plattform oder die Anzahl der Klicks auf Lernaktivitäten.

Mit diesen Daten kann eine KI eine Liste von Studierenden erstellen, die Unterstützung benötigen könnten. Diese Information kann die Hochschule auf drei verschiedene Arten verwenden:

1. **Automatische Liste ohne die Intervention von Menschen:** Die Hochschule kann automatisch (ohne dass Menschen diese Information erhalten) eine E-Mail an betroffene Studierende schicken, um sie zu informieren, dass deren System identifiziert haben, dass sie möglicherweise Unterstützung brauchen. In der E-Mail wird es empfohlen die dozierende Person oder andere relevante Personen zu kontaktieren oder andere Lernmittel zu lesen.
2. **Liste an Dozierende, die intervenieren können:** Die Hochschule stellt diese Liste an Dozierende zur Verfügung, damit sie proaktiv die Studierende schreiben oder ansprechen und Hilfe anbieten (z.B. zusätzliche Übungen oder Lektüre, Fragen an TutorInnen zu schicken) können.
3. **Strukturelle Massnahmen für zukünftige Studierende:** Die Hochschule nutzt die Information, um zu verstehen, welche Gruppen von Studierenden Unterstützung benötigen. Auf diese Grundlage kann die Hochschule strukturelle Anpassungen vornehmen, wie zum Beispiel das Angebot von Nachhilfekursen oder die Änderung der Kursstruktur.

[ENDE DER BESCHREIBUNG DES ANWENDUNGSFALLS fragen: ist der Fall für Sie klar?]

1. Was denken Sie von der Anwendung, die ich Ihnen beschrieben habe?
   1. Welche Vorteile sehen Sie für sich?
   2. Welche Nachteile sehen Sie für sich?
   3. Was denken Sie von den unterschiedlichen Interventionen?
      1. Automatische Liste ohne die Intervention des Dozierenden
      2. Liste an Dozierende, die intervenieren können
      3. Strukturelle Massnahmen für zukünftige Studierende
2. Wie würden Sie reagieren, wenn Sie eine proaktive Unterstützung dank der KI-Vorhersage angeboten würden?
   1. Wie würden Sie sich fühlen?
   2. Wenn die Gefühle negativ sind: wie könnte die Intervention geändert werden, damit es für sie hilfreich wäre?
3. Würden Sie Ihre ADHS für einen Früherkennungssystem angeben?
   1. Welche Vor- und Nachteile sehen Sie, diese Information anzugeben?
   2. Es wurde festgestellt, dass die Vorhersage für Studierende mit Beeinträchtigungen schlechter sein könnten, wenn die KI mit keinen Daten über Beeinträchtigungen trainiert wurden. Mit diesem Wissen, würden Sie deine ADHS angeben?
4. Wer sollte Zugang auf Ihre Daten haben?
5. Wie sollten Ihre Daten gespeichert werden?
6. Würden Sie sich wünschen, dass KI für Früherkennungsystem an Ihrer Hochschule benutzt wird?

### Anwendungsfall 2: KI-Tutor

Stellen Sie sich einen KI-Tutor vor, der wie folgt im Studium unterstützen:

1. **Lernen und Vorbereitung für Prüfungen:** Die KI könnte durch Diskussionen Sie auf eine Prüfung vorbereiten (als Sparringpartner). Sie könnte auch Ihre Fragen zum Unterrichtsinhalt beantworten.
2. **Erklärungen zu Aufgaben oder Anweisungen:** Die KI könnte Ihnen die Anweisungen zu einer Übung erklären.
3. **Korrekturlesen:** Die KI könnte Ihre Texte korrigieren und Verbesserungen vorschlagen.
4. **Beratung für Studienpläne und Lernmittel:** Die KI könnte Kurse und Lernressourcen für Sie empfehlen. Zum Beispiel, wenn Sie lieber mit Videos lernen, könnte die KI Ihnen Lernvideos anstelle von Artikeln vorschlagen.
5. **Unterstützung von Zeitmanagement und Organisation:** Die KI könnte zum Beispiel einen Lernplan erstellen und Erinnerungen für wichtige Deadlines an der Hochschule schicken.
6. **Unterstützung der Vernetzung mit Studierenden:** Zum Beispiel könnte die KI Ihnen Gruppen von Studierenden mit gemeinsamen Interessen empfehlen.

[ENDE DER BESCHREIBUNG DES ANWENDUNGSFALLS, fragen: ist der Fall für Sie klar?]

1. Was denken Sie von der Anwendung, die ich Ihnen beschrieben habe?
   1. Welche Vorteile sehen Sie für sich?
   2. Welche Nachteile sehen Sie für sich?
2. Welche Funktionen des KI-Tutor wären besonders hilfreich?
   1. Lernen und Vorbereitung für Prüfungen
   2. Erklärungen zu Aufgaben oder Anweisungen
   3. Korrekturlesen
   4. Beratung für Studienpläne und Lernmittel
   5. Unterstützung von Zeitmanagement und Organisation
   6. Unterstützung der Vernetzung mit Studierenden
3. Welche Funktionen des KI-Tutors wären nicht hilfreich?
4. Würden Sie zum KI-Tutor schreiben oder sagen, dass Sie ADHS haben?
   1. Welche Vor- und Nachteile sehen Sie, diese Information anzugeben?
5. Wer sollte Zugang auf Ihre Daten haben?
   1. Was würden Sie denken, wenn der Dozent die Austausche mit dem KI-Tutor lesen könnte, um seinen Kurs anzupassen?
   2. Was würden Sie denken, wenn die Studiengangsleiter diese Informationen analysieren würden, um die Qualität der Vorlesung zu bewerten und zu verbessern?
6. Wie sollten Ihre Daten gespeichert werden?
   1. Anonym oder mit persönlicher Identifikation?
   2. Sollten die Chatverläufe gespeichert werden?
7. Existierende KI-Lösungen für Korrekturlesen (zum Beispiel Grammarly oder ChatGPT) gehören privat Unternehmen, die oft in den USA sind. In Zukunft könnten solche Lösungen von der Universität angeboten werden. Die Daten würden dann an der Universität gespeichert werden. Wie würden Sie dies finden?
8. Würden Sie sich wünschen, dass KI als Tutor an Ihrer Hochschule benutzt wird?

## Schlussfragen

1. Was denken Sie über die zwei Anwendungsfälle, die wir besprochen haben?
   1. Gibt es eine Anwendung von KI, die Sie im Studium gerne haben möchten, die wir nicht gesprochen haben?
2. Möchten Sie noch etwas zum Thema hinzufügen, was ich noch nicht gefragt habe?

# English Version: Interview Guide

Please note that the interview guide was translated into English for readers and reviewers who do not speak German. All interviews were conducted in German.

## Project description, interview process and declaration of consent

Thank you again for participating in my study.

You should have already read and signed the consent form. In the declaration we have informed you that the interview will be recorded and automatically transcribed with MS Teams. The video data will only be deleted after transcription and analysis. We need the video data to correct the transcripts. Your data will only become anonymous once we have corrected the transcripts and deleted the videos. My research assistant, Albiona Hajdari (ZHAW), and I will correct and code the transcripts. If you know Albiona and do not want her to know about your participation, please let me know. In this case, I will personally correct your transcript. Other people who may be involved in the project are my two supervisors, Prof. Dr. Alireza Darvishy (ZHAW) and PD Dr. Markus Christen (UZH). Your e-mail address is currently linked to your participant number so that we can coordinate the interviews and link the survey data to the interviews. This link between email and number will be deleted at the end of the data collection.

Your data will be stored on the UZH OneDrive. The cloud meets the security standards of the University of Zurich. The anonymized data can also be stored on a repository for research data as part of the publication process.

The interview consists of three parts. First, we will talk about your use of AI in higher education and whether and how you want to disclose your ADHD. Then we will discuss two specific AI use cases. I will explain the AI application to you and you can ask me questions before I ask the question about the use case. Finally, I will ask you to reflect on our discussion.

When you answer, you are welcome to give me examples. If you don't want to answer a question, you can tell me without giving a reason.

Do you have any questions before I start the recording?

[Start the recording]

## Introductory questions: AI use and ADHD disclosure in higher education

1. How do you use AI in your studies?
2. Which AI do you use?
3. How has your experience with AI been so far?
4. How do you handle your personal data?
5. How does the university handle your data?
6. How easy is it for you to talk about your ADHD?
7. How does ADHD affect your everyday life as a student?
8. What is your experience of talking about your ADHD or needs with other people at college?
9. Where do you look for information about ADHD?

## Use cases

Now I would like to discuss two applications of AI with you. The use cases are examples of AI in higher education that are currently under development and already in use at some universities around the world. In these examples, we assume that the data is secure and will not be shared with other third parties without your permission.

After I have explained the case to you, you can ask me more questions about the case to understand it better. After that, I will ask you some questions about your opinion on the case.

### Use case 1: Early Warning System

It is possible to use student data to identify at an early stage which students might need support for an exam or their studies. Often, data such as grades in relevant subjects of the Matura or previous semesters as well as interaction data with learning platforms such as Moodle are used. Interaction data includes, for example, the time spent on the platform or the number of clicks on learning activities.

With this data, an AI can create a list of students who might need support. The university can use this information in three different ways:

1. **Intervention without humans:** an automatic system contacts students via e-mail directly to inform them that they were identified as potentially requiring support. The e-mail recommends contacting a relevant person (e.g. lecturer) or reading additional learning materials.
2. **Intervention with lecturers:** the list of students requiring help is sent to lecturers who then proactively seek to support them by offering their help or starting a discussion.
3. **Structural intervention for future students:** the information is used at the group level to change the university structurally (e.g. curricula, provision of support offers targeting specific groups).

[END OF USE CASE DESCRIPTION ask: is the case clear to you?]

1. What do you think of the application I have described to you?
   1. What advantages do you see for yourself?
   2. What disadvantages do you see for yourself?
   3. What do you think of the different interventions?
2. Automatic list without the intervention of the lecturer
3. List of lecturers who can intervene
4. Structural measures for future students
5. How would you react if you were offered proactive support thanks to AI prediction?
   1. How would you feel?
   2. If the feelings are negative: how could the intervention be changed so that it would be helpful for you?
6. Would you disclose your ADHD for an Early Warning System?
   1. What do you see as the advantages and disadvantages of providing this information?
   2. It has been noted that predictions for students with impairments could be worse if the AIs were trained with no data on disability. Knowing this, would you share your ADHD?
7. Who should have access to your data?
8. How should your data be stored?
9. Would you like your university to use AI for early warning systems?

### Use case 2: AI Tutor

Imagine an AI tutor who supports you in your studies as follows:

1. **Studying and preparing for an exam:** The AI could prepare students for an exam through discussion (as a sparring partner). It could also answer questions about the lesson content.
2. **Explanations of exercises and instructions:** The AI could explain the instructions of an exercise without giving the answer.
3. **Editing:** The AI could edit text and suggest improvements.
4. **Advice on courses and learning materials:** The AI could recommend courses and learning materials. For example, if a student prefers to learn with videos, the AI could suggest learning videos instead of articles.
5. **Support for time management and organization:** The AI could, for example, create a learning plan and send reminders for important deadlines at the university.
6. **Support networking among students:** For example, the AI could recommend groups of students with common interests.

[END OF USE CASE DESCRIPTION ask: is the case clear to you?]

1. What do you think of the application I have described to you?
   1. What advantages do you see for yourself?
   2. What disadvantages do you see for yourself?
2. Which functions of the AI tutor would be particularly helpful?
   1. Learning and preparing for exams
   2. Explanations of tasks or instructions
   3. Proofreading
   4. Advice on study plans and learning materials
   5. Support for time management and organization
   6. Support for networking with students
3. Which functions of the AI tutor would not be helpful?
4. Would you write or tell the AI tutor that you have ADHD?
   1. What advantages and disadvantages do you see in providing this information?
5. Who should have access to your data?
   1. What would you think if the lecturer could read the exchanges with the AI tutor to customize their course?
   2. What would you think if course directors analyzed this information to evaluate and improve the quality of the lecture?
6. How should your data be stored?
   1. Anonymously or with personal identification?
   2. Should chat histories be stored?
7. Existing AI solutions for proofreading (for example Grammarly or ChatGPT) are privately owned companies, often in the US. In the future, such solutions could be offered by the university. The data would then be stored at the university. How would you feel about this?
8. Would you like your university to offer AI tutors?

## Final questions

1. What do you think about the two use cases we have discussed?
   1. Is there an AI application that you would like to have in your studies that we haven't talked about?
2. Is there anything else you would like to add to the topic that I haven't asked about?
